# Supplementary material for: Sensing Bioavailable Water Content of Granulated Matrices: A Combined Experimental and Computational Study
Source: MDPI journal article supplement (doi:10.3390/bios13020185), 2023-01-25
Supplement: s1 [file s1]

# Sensing Bioavailable Water Content of Granulated Matrices: A Combined Experimental and Computational Study

Ria Ghosh <sup>1</sup>, Neha Bhattacharyya <sup>2</sup>, Amrita Banerjee <sup>3</sup>, Lopamudra Roy <sup>4</sup>, Debdatta Mukherjee <sup>5</sup>, Soumendra Singh <sup>1</sup>, Arpita Chattopadhyay <sup>6</sup>, Tapan Adhikari <sup>7,\*</sup> and Samir Kumar Pal <sup>1,\*</sup>

<sup>1</sup> Department of Chemical, Biological and Macromolecular Sciences, S. N. Bose National Centre for Basic Sciences, Kolkata 700106, India

<sup>2</sup> Department of Radio Physics and Electronics, University of Calcutta, Kolkata 700009, India

<sup>3</sup> Department of Physics, Jadavpur University, Kolkata 700032, India

<sup>4</sup> Department of Applied Optics and Photonics, University of Calcutta, Kolkata 700009, India

<sup>5</sup> Department of Biochemistry and Biophysics, University of Kalyani, Kalyani 741235, India

<sup>6</sup> Department of Basic Science and Humanities, Techno International, Kolkata 700156, India

<sup>7</sup> Indian Institute of Soil Science Nabibagh, Bhopal 462038, India

\* Correspondence: tapan\_12000@rediffmail.com (T.A.); skpal@bose.res.in (S.K.P.)

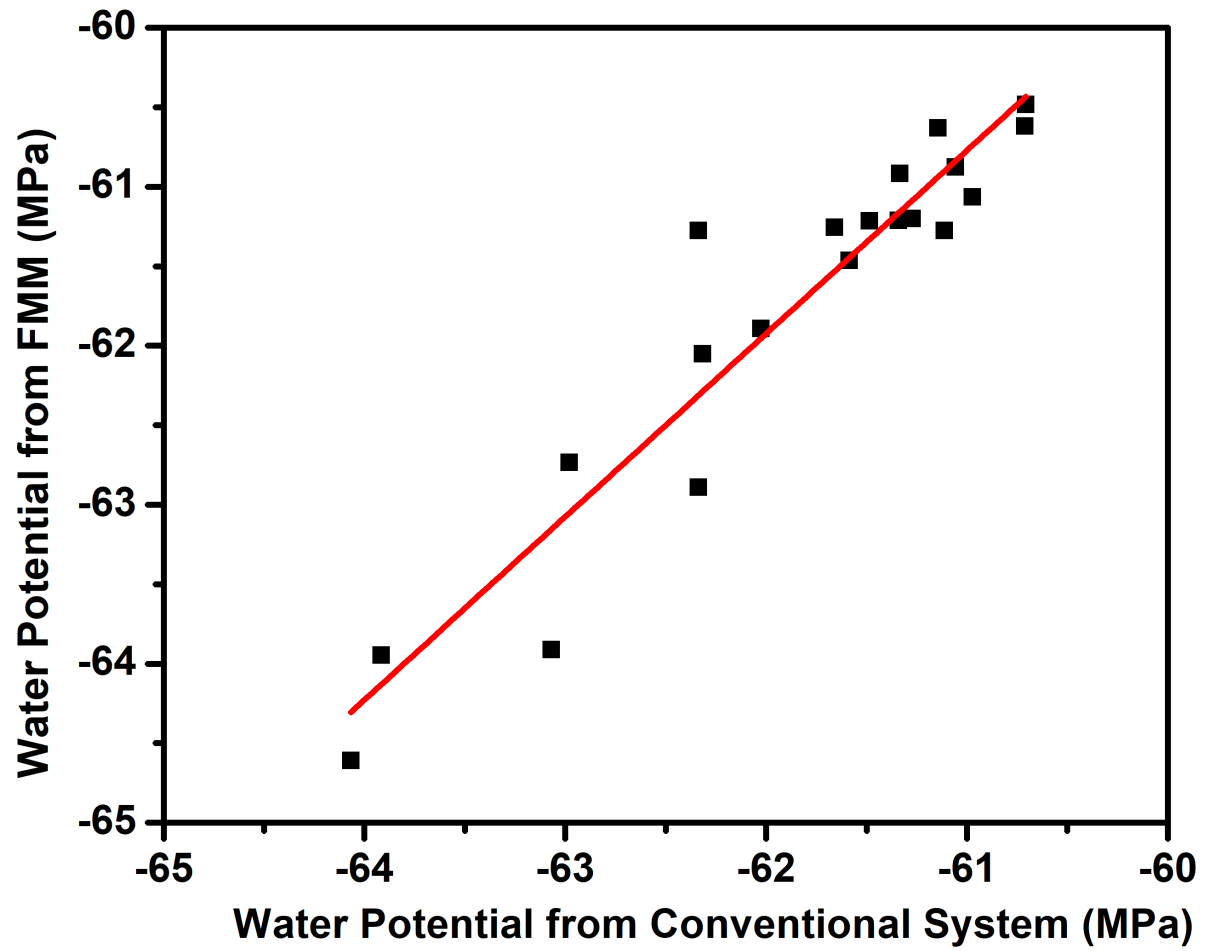

**Figure S1:** Validation curve for quantification of water potential using the conventional system and the FMM sensor.
